# Supplementary material for: Effects of Silybum marianum L. Seed Extracts on Multi Drug Resistant (MDR) Bacteria
Source: MDPI journal article supplement (doi:10.3390/molecules29010064), 2023-12-21
Supplement: s1 [file s1]

# Supplementary Materials

## Effects of *Silybum marianum* L. Seed Extracts on Multi Drug Resistant (MDR) Bacteria

Shimaa El-Sapagh <sup>1</sup>, Nanis G. Allam <sup>1</sup>, Mohamed Nour El-Dein El-Sayed <sup>2</sup>,  
Asmaa Ahmed El-Hefnawy <sup>1,\*</sup>, Grazyna Korbecka-Glinka <sup>3,\*</sup> and Awad Y. Shala <sup>4</sup>

<sup>1</sup> Botany and Microbiology Department, Faculty of Science Tanta University, Tanta 31527, Egypt; shimaa.elsapagh@gmail.com (S.E.-S.)

<sup>2</sup> Soil, Water and Environment Research Institute, Agricultural Research Station, Sakha, Kafr El-Sheikh 33717, Egypt; drmohamednour1961@gmail.com

<sup>3</sup> Department of Plant Breeding and Biotechnology, Institute of Soil Science and Plant Cultivation—State Research Institute, Czartoryskich 8, 24-100 Pulawy, Poland

<sup>4</sup> Medicinal and Aromatic Plants Research Department, Horticulture Research Institute, Agricultural Research Center (ARC), Giza 12619, Egypt; awad.shala@yahoo.com

\* Correspondence: asmaaahmed2266adelsalam@gmail.com (A.A.E.-H.); gkorbecka@iung.pulawy.pl (G.K.-G.)

**Table S1.** Antibiotic efficiency against three selected isolates of Gram-negative bacteria *Stenotrophomonas maltophilia*, *Klebsiella pneumoniae*, *Escherichia coli* determined by means of Vitek 2 Compact-15.

| Antibiotic                                  | Minimum inhibitory concentration (mg/L) |                      |                |
|---------------------------------------------|-----------------------------------------|----------------------|----------------|
|                                             | <i>S. maltophilia</i>                   | <i>K. pneumoniae</i> | <i>E. coli</i> |
| Extended-spectrum $\beta$ -lactamase (ESBL) | Not-detected                            | NEG                  | NEG            |
| Ampicillin                                  | $\geq 32^R$                             | $\geq 32^R$          | $\geq 32^R$    |
| Ampicillin/sulbactam                        | $\geq 32^R$                             | $\geq 32^R$          | $\geq 32^R$    |
| Amoxicillin/clavulanic acid                 | $\geq 32^R$                             | $\geq 32^R$          | $\geq 32^R$    |
| Piperacillin/tazobactam                     | $\geq 128^R$                            | $\geq 128^R$         | $\geq 128^R$   |
| Cefazolin                                   | $\geq 64^R$                             | $\geq 64^R$          | $\geq 64^R$    |
| Cefoxitin                                   | $\geq 64^R$                             | $\geq 64^R$          | $\geq 64^R$    |
| Ceftazidime                                 | $\geq 64^R$                             | $\geq 64^R$          | $\geq 64^R$    |
| Ceftriaxone                                 | $\geq 64^R$                             | $\geq 64^R$          | $\geq 64^R$    |
| Cefepime                                    | $\geq 64^R$                             | $\geq 64^R$          | $\geq 64^R$    |
| Aztreonam                                   | $\geq 64^R$                             | $\geq 64^R$          | $\geq 64^R$    |
| Ertapenem                                   | $\geq 8^R$                              | $\geq 8^R$           | $\geq 8^R$     |
| Imipenem                                    | $\geq 16^R$                             | $\geq 16^R$          | $\geq 16^R$    |
| Meropenem                                   | $\geq 16^R$                             | $\geq 16^R$          | $\geq 16^R$    |
| Amikacin                                    | $\geq 64^R$                             | $16^S$               | $\geq 64^R$    |
| Gentamicin                                  | $\geq 16^R$                             | $\geq 16^R$          | $4^S$          |
| Tobramycin                                  | $\geq 16^R$                             | $\geq 16^R$          | $\geq 16^R$    |
| Ciprofloxacin                               | $\geq 4^R$                              | $\geq 4^R$           | $\geq 4^R$     |
| Levofloxacin                                | $\geq 8^R$                              | $\geq 8^R$           | $\geq 8^R$     |
| Tetracycline                                | $\geq 16^R$                             | $\geq 16^R$          | $\geq 16^R$    |
| Nitrofurantoin                              | $\geq 512^R$                            | $64^I$               | $\geq 512^R$   |
| Trimethoprim/sulfamethoxazole               | $40^S$                                  | $\geq 320^R$         | $\geq 320^R$   |

\* Interpretation of the result indicated in the superscript: S-sensitive; R: resistant, I: intermediate. NEG: negative (the isolate was sensitive to  $\beta$ -lactam class)

**Table S2.** Antibiotic efficiency against *S. aureus* determined by means of Vitek 2 Compact-15.

| Antibiotics                      | Minimum inhibitory concentration (mg/L) | Interpretation* |
|----------------------------------|-----------------------------------------|-----------------|
| Cefoxitin screen                 | POS                                     |                 |
| Benzylpenicillin                 | ≥0.5                                    | R               |
| Oxacillin                        | ≥4                                      | R               |
| Gentamicin                       | ≥16                                     | R               |
| Ciprofloxacin                    | ≤0.5                                    | S               |
| Moxifloxacin                     | ≤0.25                                   | S               |
| Inducible clindamycin resistance | POS                                     |                 |
| Erythromycin                     | ≥8                                      | R               |
| Clindamycin                      | ≥4                                      | R               |
| Linezolid                        | 2                                       | S               |
| Teicoplanin                      | ≤0.5                                    | S               |
| Vancomycin                       | ≤0.5                                    | S               |
| Tetracycline                     | ≥16                                     | R               |
| Fusidic acid                     | 8                                       | R               |
| Rifampicin                       | ≤0.5                                    | S               |
| Trimethoprim/sulfamethoxazole    | ≤10                                     | S               |

\* Interpretation of the results: S-sensitive; R: resistant, POS: positive (*S. aureus* was resistant to Cefoxitin)

**Table S3.** Biochemical characterization of four multi drug resistant bacterial isolates using Biomerieux Vitek. The percentages (%) provided next to species names indicate probability of their identification.

| Test (Mnemonic)               |                       | <i>K. pneumoniae</i><br>(98%)<br>(isolate no. NDL224) | <i>E. coli</i><br>(99%)<br>(isolate no. NDL225) | <i>S. maltophilia</i><br>(99%)<br>(isolate no. NDL2210) | <i>S. aureus</i><br>(98%)<br>(isolate no. NDL2220) |
|-------------------------------|-----------------------|-------------------------------------------------------|-------------------------------------------------|---------------------------------------------------------|----------------------------------------------------|
| Ala-Phe-Pro-Arylamidase       | <b>APPA</b>           | -                                                     | -                                               | +                                                       | -                                                  |
| Adonitol                      | <b>ADO</b>            | +                                                     | -                                               | -                                                       |                                                    |
| L-Pyrrolydonyl-Arylamidaes    | <b>PyrA</b>           | +                                                     | -                                               | -                                                       | +                                                  |
| L-Arabitol                    | <b>IARL</b>           | -                                                     | -                                               | -                                                       |                                                    |
| D-Cellobiose                  | <b>dCEL</b>           | +                                                     | -                                               | -                                                       |                                                    |
| Beta-Galactosidase            | <b>BGAL</b>           | +                                                     | +                                               | -                                                       | -                                                  |
| H <sub>2</sub> S production   | <b>H<sub>2</sub>S</b> | -                                                     | -                                               | -                                                       |                                                    |
| Beta-N-Acetyl-Glucosaminidase | <b>BANG</b>           | -                                                     | -                                               | -                                                       |                                                    |
| Glutamyl Arylamidase pNA      | <b>AGLTp</b>          | -                                                     | -                                               | -                                                       |                                                    |
| D-Glucose                     | <b>dGLU</b>           | +                                                     | +                                               | -                                                       |                                                    |
| Gamma-Glutamyl-Transferase    | <b>GGT</b>            | +                                                     | -                                               | +                                                       |                                                    |
| Fermentation/ Glucose         | <b>OFF</b>            | +                                                     | +                                               | -                                                       |                                                    |
| Beta-Glucosidase              | <b>BGLU</b>           | +                                                     | -                                               | +                                                       |                                                    |
| D-Maltose                     | <b>dMAL</b>           | +                                                     | +                                               | -                                                       | +                                                  |
| D-Mannitol                    | <b>dMAN</b>           | +                                                     | +                                               | -                                                       | +                                                  |
| D-Mannose                     | <b>dMNE</b>           | +                                                     | +                                               | -                                                       | +                                                  |
| Beta-Xylosidase               | <b>BXYL</b>           | +                                                     | -                                               | -                                                       |                                                    |
| Beta-Alnine arylamidase pNA   | <b>BAlap</b>          | -                                                     | -                                               | -                                                       |                                                    |
| L-Proline Arylamidase         | <b>ProA</b>           | -                                                     | -                                               | +                                                       | -                                                  |
| Lipase                        | <b>LIP</b>            | -                                                     | -                                               | +                                                       |                                                    |
| Palatinose                    | <b>PLE</b>            | +                                                     | -                                               | -                                                       |                                                    |
| Tyrosine Arylamidase          | <b>TyrA</b>           | +                                                     | -                                               | -                                                       | -                                                  |
| Urease                        | <b>URE</b>            | -                                                     | -                                               | -                                                       | +                                                  |
| D-Sorbitol                    | <b>dSOR</b>           | +                                                     | +                                               | -                                                       | -                                                  |
| Saccharose/Sucrose            | <b>SAC</b>            | +                                                     | +                                               | -                                                       | +                                                  |
| D-Tagatose                    | <b>dTAG</b>           | -                                                     | -                                               | -                                                       |                                                    |
| D-Trehalose                   | <b>dTRE</b>           | +                                                     | +                                               | -                                                       | +                                                  |
| Citrate (Sodium)              | <b>CIT</b>            | +                                                     | -                                               | +                                                       |                                                    |
| Malonate                      | <b>MNT</b>            | +                                                     | -                                               | -                                                       |                                                    |
| 5-Keto-D-Glucnate             | <b>5KG</b>            | -                                                     | -                                               | -                                                       |                                                    |
| L-Lactate alkalinisation      | <b>ILATk</b>          | +                                                     | +                                               | +                                                       | +                                                  |
| Alpha-Glucosidase             | <b>AGLU</b>           | -                                                     | -                                               | +                                                       | +                                                  |

|                                      |               |   |   |   |   |
|--------------------------------------|---------------|---|---|---|---|
| Succinate alkalinisation             | <b>SUCT</b>   | - | + | + |   |
| Beta-N-Acetyl-Galactosaminidase      | <b>NAGA</b>   | - | - | - |   |
| Alpha-Galactosidase                  | <b>AGAL</b>   | + | + | + | - |
| Phosphatase                          | <b>PHOS</b>   | + | - | + | + |
| Glycine Arylamidase                  | <b>GlyA</b>   | + | - | - |   |
| Ornithine decarboxylase              | <b>ODC</b>    | - | + | - |   |
| Lysine decarboxylase                 | <b>LDC</b>    | + | + | - |   |
| L-Histidine assimilation             | <b>IHISa</b>  | - | - | - |   |
| Coumarate                            | <b>CMT</b>    | + | + | - |   |
| Beta-Glucoronidase                   | <b>BGUR</b>   | - | + | - | - |
| O/ 129 Resistance (comp.vibrio.)     | <b>O 129R</b> | + | + | - | + |
| Glu-Gly-Arg-Arylamidase              | <b>GGAA</b>   | - | - | + |   |
| L-Malate assimilation                | <b>IMLTa</b>  | - | - | - |   |
| Ellman                               | <b>ELLM</b>   | - | + | - |   |
| L-Lactate assimilation               | <b>ILATa</b>  | - | - | - |   |
| D-Amygdalin                          | <b>AMY</b>    |   |   |   | - |
| Phosphatidylinositol Phospholipase C | <b>PIPLC</b>  |   |   |   | - |
| D-Xylose                             | <b>dXYL</b>   |   |   |   | - |
| Arginine dihydrolase 1               | <b>ADH 1</b>  |   |   |   | + |
| Cyclodextrin                         | <b>CDEX</b>   |   |   |   | - |
| L-Aspartate Arylamidase              | <b>AspA</b>   |   |   |   | - |
| Beta Galactopyranosidase             | <b>BGAR</b>   |   |   |   | - |
| Alpha-Mannosidase                    | <b>AMAN</b>   |   |   |   | - |
| Leucine Arylamidase                  | <b>LeuA</b>   |   |   |   | - |
| Beta Glucuronidase                   | <b>BGURr</b>  |   |   |   | - |
| Alanine Arylamidase                  | <b>AlaA</b>   |   |   |   | - |
| Polymixin B resistance               | <b>POLYB</b>  |   |   |   | + |
| D-Galactose                          | <b>dGAL</b>   |   |   |   | + |
| D-Ribose                             | <b>dRIB</b>   |   |   |   | - |
| Lactose                              | <b>LAC</b>    |   |   |   | - |
| N-Acetyl-D-Glucosamine               | <b>NAG</b>    |   |   |   | - |
| Bacitracin Resistance                | <b>BACI</b>   |   |   |   | + |
| Novobiocin Resistance                | <b>NOVO</b>   |   |   |   | - |
| Growth in 6.5 % NaCl                 | <b>NC6.5</b>  |   |   |   | + |
| Methyl-B-D-Glucopyranoside           | <b>MBdG</b>   |   |   |   | + |
| Pullulan                             | <b>PUL</b>    |   |   |   | - |
| D-Raffinose                          | <b>dRAF</b>   |   |   |   | - |
| Salicin                              | <b>SAL</b>    |   |   |   | - |
| Arginine dihydrolase 2               | <b>ADH2s</b>  |   |   |   | - |
| Optochin Resistance                  | <b>OPTO</b>   |   |   |   | + |

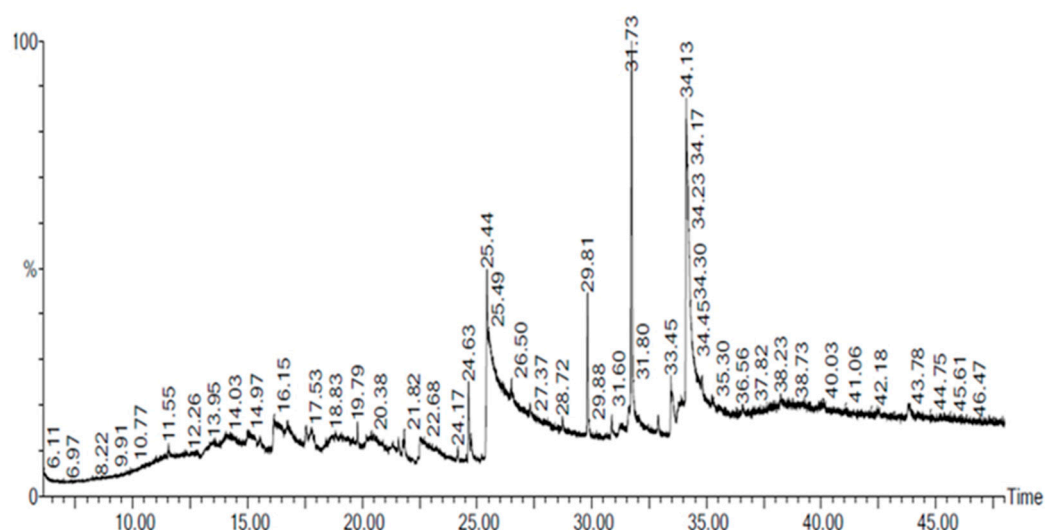

**Figure S1.** GC–MS chromatograph of ethanol extract of *Silybum marianum* seeds

**Table S4.** Active components of *S. marianum* seed ethanol extract identified by means of GC-MS. For each compound, retention time (RT), peak area percentage, molecular formula (MF) and molecular weight (MW).

| Peak no. | RT    | Area % | Compound name                                                                                               | MF                                                             | MW     |
|----------|-------|--------|-------------------------------------------------------------------------------------------------------------|----------------------------------------------------------------|--------|
| 4        | 13.95 | 4.332  | d-Mannose                                                                                                   | C <sub>6</sub> H <sub>12</sub> O <sub>6</sub>                  | 180.16 |
| 8        | 14.97 | 1.876  | N-methyl-1-adamantaneacetamide                                                                              | C <sub>13</sub> H <sub>21</sub> NO                             | 207.31 |
| 12       | 16.15 | 14.839 | d-Mannitol, 1-decylsulfonyl-(sugar alcohol with sulfur)                                                     | C <sub>16</sub> H <sub>34</sub> O <sub>7</sub> S               | 370.51 |
| 14       | 17.54 | 0.830  | Desulfosinigrin                                                                                             | C <sub>10</sub> H <sub>17</sub> NO <sub>6</sub> S              | 279.31 |
| 21       | 24.63 | 0.616  | 9,12-Octadecadienoic acid, methyl ester, (E,E)-(linolelaidic acid, methyl ester), or (methyl linolelaidate) | C <sub>19</sub> H <sub>34</sub> O <sub>2</sub>                 | 294.47 |
| 22       | 25.44 | 20.000 | 9,12-Octadecadienoic acid (Z,Z)-(linoleic acid)                                                             | C <sub>18</sub> H <sub>32</sub> O <sub>2</sub>                 | 280.44 |
| 27       | 31.73 | 3.276  | 1,2-Benzenedicarboxylic acid, diisooctyl ester (diisooctyl phthalate)                                       | C <sub>24</sub> H <sub>38</sub> O <sub>4</sub>                 | 390.56 |
| 28       | 33.45 | 3.097  | 1-Monolinoleoylglycerol trimethylsilyl ether                                                                | C <sub>27</sub> H <sub>54</sub> O <sub>4</sub> Si <sub>2</sub> | 498.89 |
| 29       | 34.13 | 9.596  | Linoleic acid ethyl ester (ethyl linoleate) (mandenol)                                                      | C <sub>20</sub> H <sub>36</sub> O <sub>2</sub>                 | 308.50 |

**Table S5.** Identified SMILES strings for the nine phytochemical compounds from *Silybum marianum* seed extract: that were detected by GC-MS and retrieved from PubChem database of phytochemical constitutions

| No. | Compound                                                    | SMILES                                                             |
|-----|-------------------------------------------------------------|--------------------------------------------------------------------|
| 1   | d-Mannose                                                   | <chem>C(C1C(C(C(C(O1)O)O)O)O)O</chem>                              |
| 2   | N-methyl-1-adamantaneacetamide                              | <chem>CNC(=O)CC12CC3CC(C1)CC(C3)C2</chem>                          |
| 3   | d-Mannitol, 1-decylsulfonyl-<br>(sugar alcohol with sulfur) | <chem>CCCCCCCCCCCCS(=O)(=O)CC(C(C(C(CO)O)O)O)O</chem>              |
| 4   | Desulfosinigrin                                             | <chem>C=CCC(=NO)SC1C(C(C(C(O1)CO)O)O)O</chem>                      |
| 5   | 9,12-Octadecadienoic acid,<br>methyl ester                  | <chem>CCCCC=CCC=CCCCCCCCC(=O)OC</chem>                             |
| 6   | linoleic acid                                               | <chem>CCCCC=CCC=CCCCCCCCC(=O)O</chem>                              |
| 7   | diisooctyl phthalate                                        | <chem>CC(C)CCCCCOC(=O)C1=CC=CC=C1C(=O)OCCCCC(C)C</chem>            |
| 8   | 1-Monolinoleoylglycerol<br>trimethylsilyl ether             | <chem>CCCCC=CCC=CCCCCCCCC(=O)OCC(CO[Si](C)(C)C)O[Si](C)(C)C</chem> |
| 9   | mandenol                                                    | <chem>CCCCC=CCC=CCCCCCCCC(=O)OCC</chem>                            |

**Table S6.** Physicochemical and ADMET properties of the nine compounds identified in *Silybum marianum* seed extract: (1) d-Mannose, (2) N-methyl-1-adamantaneacetamide, (3) d-Mannitol, 1-decylsulfonyl-(sugar alcohol with sulfur), (4) Desulfosinigrin, (5) 9,12-Octadecadienoic acid, methyl ester, (6) Linoleic acid, (7) Diisooctyl phthalate, (8) 1-Monolinoleoylglycerol trimethylsilyl ether, (9) Mandenol.

| #                                 | 1                                             | 2                                  | 3                                                | 4                                                 | 5                                              | 6                                              | 7                                              | 8                                                              | 9                                              |
|-----------------------------------|-----------------------------------------------|------------------------------------|--------------------------------------------------|---------------------------------------------------|------------------------------------------------|------------------------------------------------|------------------------------------------------|----------------------------------------------------------------|------------------------------------------------|
| <b>Physicochemical Properties</b> |                                               |                                    |                                                  |                                                   |                                                |                                                |                                                |                                                                |                                                |
| Formula                           | C <sub>6</sub> H <sub>12</sub> O <sub>6</sub> | C <sub>13</sub> H <sub>21</sub> NO | C <sub>16</sub> H <sub>34</sub> O <sub>7</sub> S | C <sub>10</sub> H <sub>17</sub> NO <sub>6</sub> S | C <sub>19</sub> H <sub>34</sub> O <sub>2</sub> | C <sub>18</sub> H <sub>32</sub> O <sub>2</sub> | C <sub>24</sub> H <sub>38</sub> O <sub>4</sub> | C <sub>27</sub> H <sub>54</sub> O <sub>4</sub> Si <sub>2</sub> | C <sub>20</sub> H <sub>36</sub> O <sub>2</sub> |
| MW( g/mol)                        | 180.16                                        | 207.31                             | 370.5                                            | 279.31                                            | 294.47                                         | 280.45                                         | 390.56                                         | 498.89                                                         | 308.5                                          |
| #Heavy atoms                      | 12                                            | 15                                 | 24                                               | 18                                                | 21                                             | 20                                             | 28                                             | 33                                                             | 22                                             |
| Fraction Csp3                     | 1                                             | 0.92                               | 1                                                | 0.7                                               | 0.74                                           | 0.72                                           | 0.67                                           | 0.81                                                           | 0.75                                           |
| #Rotatable bonds                  | 1                                             | 3                                  | 15                                               | 5                                                 | 15                                             | 14                                             | 16                                             | 22                                                             | 16                                             |
| #H-bond acceptors                 | 6                                             | 1                                  | 7                                                | 7                                                 | 2                                              | 2                                              | 4                                              | 4                                                              | 2                                              |
| #H-bond donors                    | 5                                             | 1                                  | 5                                                | 5                                                 | 0                                              | 1                                              | 0                                              | 0                                                              | 0                                              |
| LogS (log mol/L)                  | -0.017                                        | -2.564                             | -2.116                                           | -0.517                                            | -6.465                                         | -5.23                                          | -7.04                                          | -7.192                                                         | -6.596                                         |
| LogD (log mol/L)                  | -2.139                                        | 2.709                              | 1.038                                            | -0.695                                            | 4.646                                          | 3.58                                           | 5.345                                          | 6.399                                                          | 4.803                                          |
| LogP (log mol/L)                  | -2.499                                        | 2.301                              | 0.183                                            | -0.76                                             | 6.992                                          | 6.652                                          | 7.494                                          | 8.363                                                          | 7.217                                          |
| <b>Absorption parameters</b>      |                                               |                                    |                                                  |                                                   |                                                |                                                |                                                |                                                                |                                                |
| Pgp-inh                           | 0.001                                         | 0.035                              | 0.003                                            | 0.003                                             | 0.001                                          | 0                                              | 0.968                                          | 0.258                                                          | 0.001                                          |
| Pgp-sub                           | 0.098                                         | 0.001                              | 0.024                                            | 0.001                                             | 0.028                                          | 0.002                                          | 0                                              | 0.005                                                          | 0.013                                          |
| HIA                               | 0.899                                         | 0.006                              | 0.938                                            | 0.912                                             | 0.007                                          | 0.01                                           | 0.001                                          | 0.005                                                          | 0.003                                          |
| F(20%)                            | 0.054                                         | 0.002                              | 0.996                                            | 0.728                                             | 0.008                                          | 0.009                                          | 0.988                                          | 0.008                                                          | 0.008                                          |
| F(30%)                            | 0.944                                         | 0.002                              | 0.972                                            | 0.997                                             | 0.775                                          | 0.549                                          | 0.956                                          | 0.033                                                          | 0.729                                          |
| Caco-2 (log cm/s)                 | -5.318                                        | -4.62                              | -5.778                                           | -5.598                                            | -4.551                                         | -4.733                                         | -4.655                                         | -4.811                                                         | -4.526                                         |
| MDCK (log cm/s)                   | 0.001190525                                   | 4.71E-05                           | 6.13E-05                                         | 0.000211674                                       | 1.91E-05                                       | 1.92E-05                                       | 1.83E-05                                       | 2.27E-05                                                       | 1.86E-05                                       |
| <b>Distribution parameters</b>    |                                               |                                    |                                                  |                                                   |                                                |                                                |                                                |                                                                |                                                |
| BBB                               | 0.48                                          | 0.982                              | 0.261                                            | 0.569                                             | 0.245                                          | 0.196                                          | 0.013                                          | 0.001                                                          | 0.119                                          |
| PPB %                             | 12.50%                                        | 59.27%                             | 74.81%                                           | 45.91%                                            | 96.84%                                         | 98.39%                                         | 97.63%                                         | 100.90%                                                        | 97.29%                                         |
| VDss (L/kg)                       | 0.395                                         | 0.879                              | 0.616                                            | 0.401                                             | 2.926                                          | 0.626                                          | 1.445                                          | 2.796                                                          | 2.707                                          |
| Fu %                              | 80.06%                                        | 55.91%                             | 27.49%                                           | 48.76%                                            | 2.08%                                          | 1.62%                                          | 1.57%                                          | 1.01%                                                          | 2.07%                                          |
| <b>Metabolism parameters</b>      |                                               |                                    |                                                  |                                                   |                                                |                                                |                                                |                                                                |                                                |
| CYP1A2-inh                        | 0.01                                          | 0.159                              | 0.016                                            | 0.02                                              | 0.941                                          | 0.235                                          | 0.134                                          | 0.424                                                          | 0.939                                          |
| CYP1A2-sub                        | 0.046                                         | 0.314                              | 0.092                                            | 0.031                                             | 0.179                                          | 0.171                                          | 0.178                                          | 0.605                                                          | 0.166                                          |
| CYP2C19-inh                       | 0.01                                          | 0.815                              | 0.006                                            | 0.017                                             | 0.569                                          | 0.086                                          | 0.699                                          | 0.435                                                          | 0.601                                          |
| CYP2C19-sub                       | 0.15                                          | 0.138                              | 0.226                                            | 0.059                                             | 0.064                                          | 0.066                                          | 0.06                                           | 0.488                                                          | 0.058                                          |
| CYP2C9-inh                        | 0.001                                         | 0.506                              | 0.001                                            | 0.002                                             | 0.6                                            | 0.43                                           | 0.36                                           | 0.66                                                           | 0.637                                          |

|                             |       |       |       |       |       |       |       |       |       |
|-----------------------------|-------|-------|-------|-------|-------|-------|-------|-------|-------|
| CYP2C9-sub                  | 0.16  | 0.613 | 0.693 | 0.584 | 0.947 | 0.988 | 0.878 | 0.905 | 0.937 |
| CYP2D6-inh                  | 0.002 | 0.501 | 0.001 | 0.001 | 0.167 | 0.006 | 0.116 | 0.054 | 0.337 |
| CYP2D6-sub                  | 0.133 | 0.295 | 0.028 | 0.129 | 0.139 | 0.086 | 0.022 | 0.262 | 0.098 |
| CYP3A4-inh                  | 0.004 | 0.435 | 0.007 | 0.009 | 0.692 | 0.085 | 0.254 | 0.678 | 0.608 |
| CYP3A4-sub                  | 0.01  | 0.168 | 0.027 | 0.019 | 0.065 | 0.019 | 0.088 | 0.096 | 0.068 |
| <b>Excretion parameters</b> |       |       |       |       |       |       |       |       |       |
| CL (ml/min/kg)              | 1.474 | 9.954 | 4.437 | 1.449 | 7.742 | 3.327 | 9.241 | 3.424 | 7.094 |
| T12 (hr)                    | 0.722 | 0.157 | 0.476 | 0.733 | 0.343 | 0.628 | 0.044 | 0.155 | 0.265 |
| <b>Toxicity parameters</b>  |       |       |       |       |       |       |       |       |       |
| hERG                        | 0.039 | 0.007 | 0.263 | 0.018 | 0.1   | 0.009 | 0.18  | 0.158 | 0.104 |
| H-HT                        | 0.046 | 0.689 | 0.023 | 0.074 | 0.011 | 0.013 | 0.003 | 0.01  | 0.004 |
| DILI                        | 0.09  | 0.027 | 0.053 | 0.717 | 0.022 | 0.009 | 0.367 | 0.014 | 0.02  |
| Ames                        | 0.203 | 0.004 | 0.013 | 0.336 | 0.016 | 0.013 | 0.002 | 0.234 | 0.014 |
| ROA                         | 0.139 | 0.07  | 0.007 | 0.346 | 0.009 | 0.01  | 0.003 | 0     | 0.009 |
| FDAMDD                      | 0.002 | 0.084 | 0.003 | 0.005 | 0.024 | 0.017 | 0.004 | 0.046 | 0.015 |
| SkinSen                     | 0.04  | 0.022 | 0.021 | 0.042 | 0.975 | 0.961 | 0.933 | 0.987 | 0.976 |
| Carcinogenicity             | 0.013 | 0.64  | 0.012 | 0.572 | 0.467 | 0.153 | 0.334 | 0.258 | 0.208 |
| EC                          | 0.003 | 0.003 | 0.003 | 0.003 | 0.965 | 0.984 | 0.02  | 0.998 | 0.974 |
| EI                          | 0.025 | 0.259 | 0.019 | 0.012 | 0.961 | 0.98  | 0.98  | 0.944 | 0.974 |
| Respiratory                 | 0.03  | 0.12  | 0.027 | 0.245 | 0.8   | 0.712 | 0.052 | 0.851 | 0.599 |
| BCF                         | 0.242 | 1.389 | 0.368 | 0.416 | 2.62  | 0.898 | 1.159 | 3.737 | 2.841 |
| IGC50 (mM)                  | 1.128 | 2.187 | 3.57  | 1.677 | 4.997 | 4.453 | 5.497 | 5.5   | 5.097 |
| LC50 (mM)                   | 0.821 | 3.685 | 1.81  | 2.56  | 5.339 | 5.113 | 5.652 | 3.821 | 5.568 |
| LC50DM (mM)                 | 2.23  | 5.029 | 2.949 | 3.99  | 5.197 | 4.266 | 5.159 | 5.699 | 5.178 |
| NR-AR                       | 0.496 | 0.007 | 0.342 | 0.053 | 0.78  | 0.676 | 0.032 | 0.295 | 0.395 |
| NR-AR-LBD                   | 0.012 | 0.002 | 0.002 | 0.007 | 0.004 | 0.005 | 0.003 | 0.002 | 0.005 |
| NR-AhR                      | 0.006 | 0.014 | 0.005 | 0.006 | 0.007 | 0.01  | 0.078 | 0.004 | 0.006 |
| NR-Aromatase                | 0.004 | 0.005 | 0.29  | 0.008 | 0.147 | 0.284 | 0.061 | 0.88  | 0.388 |
| NR-ER                       | 0.305 | 0.077 | 0.073 | 0.321 | 0.097 | 0.149 | 0.423 | 0.031 | 0.106 |
| NR-ER-LBD                   | 0.083 | 0.004 | 0.016 | 0.011 | 0.006 | 0.017 | 0.273 | 0.006 | 0.007 |
| NR-PPAR-gamma               | 0.003 | 0.009 | 0.318 | 0.004 | 0.39  | 0.983 | 0.005 | 0.03  | 0.352 |
| SR-ARE                      | 0.027 | 0.088 | 0.202 | 0.016 | 0.097 | 0.321 | 0.03  | 0.591 | 0.136 |
| SR-ATAD5                    | 0.041 | 0.004 | 0.006 | 0.006 | 0.006 | 0.005 | 0.005 | 0.003 | 0.003 |
| SR-HSE                      | 0.006 | 0.436 | 0.086 | 0.004 | 0.683 | 0.575 | 0.607 | 0.803 | 0.705 |



|                                        |          |          |          |          |          |          |          |             |          |
|----------------------------------------|----------|----------|----------|----------|----------|----------|----------|-------------|----------|
| SR-MMP                                 | 0.006    | 0.021    | 0.03     | 0.011    | 0.415    | 0.36     | 0.119    | 0.788       | 0.593    |
| SR-p53                                 | 0.004    | 0.005    | 0.113    | 0.003    | 0.056    | 0.067    | 0.006    | 0.199       | 0.037    |
| Vol (Å <sup>3</sup> )                  | 156.517  | 224.885  | 365.333  | 249.934  | 346.851  | 329.555  | 437.082  | 77585268.41 | 364.147  |
| Dense (g/cm <sup>3</sup> )             | 1.15     | 0.921    | 1.013    | 1.117    | 0.848    | 0.85     | 0.893    | 0           | 0.847    |
| nHA                                    | 6        | 2        | 7        | 7        | 2        | 2        | 4        | 4           | 2        |
| nHD                                    | 5        | 1        | 5        | 5        | 0        | 1        | 0        | 0           | 0        |
| TPSA Å <sup>2</sup>                    | 110.38   | 29.1     | 135.29   | 122.74   | 26.3     | 37.3     | 52.6     | 44.76       | 26.3     |
| nRot                                   | 1        | 3        | 15       | 5        | 15       | 14       | 16       | 22          | 16       |
| nRing                                  | 1        | 4        | 0        | 1        | 0        | 0        | 1        | 0           | 0        |
| MaxRing                                | 6        | 0        | 0        | 6        | 0        | 0        | 6        | 0           | 0        |
| nHet                                   | 6        | 2        | 8        | 8        | 2        | 2        | 4        | 6           | 2        |
| fChar                                  | 0        | 0        | 0        | 0        | 0        | 0        | 0        | 0           | 0        |
| nRig                                   | 6        | 13       | 2        | 8        | 3        | 3        | 8        | 3           | 3        |
| Flex                                   | 0.167    | 0.231    | 7.5      | 0.625    | 5        | 4.667    | 2        | 7.333       | 5.333    |
| nStereo                                | 5        | 0        | 4        | 5        | 0        | 0        | 0        | 1           | 0        |
| NonGenotoxic_Carcinogenicity           | 0        | 0        | 0        | 0        | 0        | 0        | 0        | 0           | 0        |
| LD50_oral (mg/kg)                      | 0        | 0        | 0        | 0        | 0        | 0        | 0        | 0           | 0        |
| Genotoxic_Carcinogenicity_Mutagenicity | 0        | 0        | 0        | 2        | 0        | 0        | 0        | 0           | 0        |
| SureChEMBL                             | 0        | 0        | 0        | 1        | 0        | 0        | 0        | 0           | 0        |
| NonBiodegradable                       | 1        | 0        | 0        | 1        | 0        | 0        | 0        | 0           | 0        |
| Skin_Sensitization                     | 1        | 0        | 0        | 0        | 0        | 0        | 0        | 0           | 0        |
| Acute_Aquatic_Toxicity                 | 2        | 0        | 0        | 0        | 0        | 0        | 0        | 0           | 0        |
| Toxicophores                           | 0        | 1        | 1        | 3        | 0        | 0        | 0        | 0           | 0        |
| Medicinal Chemistry                    |          |          |          |          |          |          |          |             |          |
| QED                                    | 0.29     | 0.74     | 0.256    | 0.145    | 0.224    | 0.318    | 0.271    | 0.069       | 0.2      |
| Synth                                  | 3.595    | 3.623    | 3.665    | 4.511    | 2.313    | 2.292    | 2.089    | 3.508       | 2.305    |
| Fsp3                                   | 1        | 0.923    | 1        | 0.7      | 0.737    | 0.722    | 0.667    | 0.815       | 0.75     |
| MCE-18                                 | 22.667   | 28.8     | 7        | 23.294   | 0        | 0        | 9        | 8           | 0        |
| Natural Product-likeness               | 2.627    | -0.44    | 0.345    | 1.221    | 1.03     | 1.187    | 0.027    | 0.784       | 0.875    |
| Alarm_NMR                              | 0        | 0        | 1        | 2        | 0        | 0        | 0        | 0           | 0        |
| BMS                                    | 0        | 0        | 1        | 1        | 0        | 0        | 0        | 1           | 0        |
| Chelating                              | 0        | 0        | 0        | 0        | 0        | 0        | 0        | 0           | 0        |
| PAINS                                  | 0        | 0        | 0        | 0        | 0        | 0        | 0        | 0           | 0        |
| Lipinski                               | Accepted    | Accepted |

|                         |          |          |          |          |          |          |          |          |          |
|-------------------------|----------|----------|----------|----------|----------|----------|----------|----------|----------|
| Lipinski #violations    | 0        | 0        | 0        | 0        | 1        | 1        | 1        | 1        | 1        |
| Pfizer                  | Accepted | Accepted | Accepted | Accepted | Rejected | Rejected | Rejected | Rejected | Rejected |
| GSK                     | Accepted | Accepted | Accepted | Accepted | Rejected | Rejected | Rejected | Rejected | Rejected |
| GoldenTriangle          | Rejected | Accepted | Accepted | Accepted | Accepted | Accepted | Rejected | Rejected | Accepted |
| Ghose #violations       | 2        | 0        | 0        | 1        | 1        | 1        | 1        | 4        | 1        |
| Veber #violations       | 0        | 0        | 2        | 1        | 1        | 1        | 1        | 1        | 1        |
| Egan #violations        | 0        | 0        | 1        | 1        | 1        | 1        | 1        | 1        | 1        |
| Muegge #violations      | 2        | 0        | 0        | 0        | 1        | 1        | 2        | 2        | 2        |
| Bioavailability Score   | 0.55     | 0.55     | 0.55     | 0.55     | 0.55     | 0.85     | 0.55     | 0.55     | 0.55     |
| Synthetic Accessibility | 4.08     | 3.66     | 5.37     | 5.14     | 3.18     | 3.1      | 3.41     | 5.93     | 3.34     |

#### Abbreviations used in Table S5.

**Physicochemical Properties:** MW: Molecular Weight, #Heavy atoms: Number of heavy atoms in the molecule, Fraction Csp3: Fraction of sp<sup>3</sup>-hybridized carbon atoms, #Rotatable bonds: Number of rotatable bonds, #H-bond acceptors: Number of hydrogen bond acceptor atoms, #H-bond donors: Number of hydrogen bond donor atoms, LogD: Distribution coefficient (ratio of concentrations in octanol and water), LogP: Partition coefficient (ratio of concentrations in octanol and water).

**Absorption: Measure of the drug's ability to be absorbed into the bloodstream,** Pgp-inh: P-glycoprotein inhibitor, Pgp-sub: P-glycoprotein substrate, HIA: Human intestinal absorption, F(20%): Fraction absorbed at 20%, F(30%): Fraction absorbed at 30%, Caco-2: Permeability coefficient in Caco-2 cell monolayers, MDCK: Permeability coefficient in MDCK cell monolayers. **Distribution: Drug distribution in tissues,** BBB: Blood-brain barrier permeability, PPB: Plasma protein binding, VDss: Volume of distribution at steady state, Fu: Fraction unbound in plasma.

**Metabolism: Drug metabolism,** CYP1A2-inh: Inhibitor of CYP1A2 enzyme, CYP1A2-sub: Substrate of CYP1A2 enzyme, CYP2C19-inh: Inhibitor of CYP2C19 enzyme, CYP2C19-sub: Substrate of CYP2C19 enzyme, CYP2C9-inh: Inhibitor of CYP2C9 enzyme, CYP2C9-sub: Substrate of CYP2C9 enzyme, CYP2D6-inh: Inhibitor of CYP2D6 enzyme, CYP2D6-sub: Substrate of CYP2D6 enzyme, CYP3A4-inh: Inhibitor of CYP3A4 enzyme, CYP3A4-sub: Substrate of CYP3A4 enzyme.

**Excretion:** Drug excretion, CL: Clearance, T12: Half-life.

**Toxicity:** hERG: Inhibition of human ether-a-go-go-related gene, H-HT: Human hepatotoxicity, DILI: Drug-induced liver injury, Ames: Ames mutagenicity, ROA: Route of administration, FDAMDD: FDA maximum daily dose, SkinSen: Skin sensitization, Carcinogenicity: Carcinogenic potential, EC: Eye corrosion, EI: Eye irritation, Respiratory: Respiratory toxicity, BCF: Bioconcentration factor, IGC50: Inhibition concentration for 50% of growth, LC50: Lethal concentration for 50% of organisms, LC50DM: Lethal concentration for 50% of fish (Danio rerio) embryos, NR-AR: Nuclear receptor androgen receptor, NR-AR-LBD: Nuclear receptor androgen receptor ligand binding domain, NR-AhR: Nuclear receptor aryl hydrocarbon receptor, NR-Aromatase: Nuclear receptor aromatase, NR-ER: Nuclear receptor estrogen receptor, NR-ER-LBD: Nuclear receptor estrogen receptor ligand binding domain, NR-PPAR-gamma: Nuclear receptor peroxisome proliferator-activated receptor gamma, SR-ARE: Stress-responsive antioxidant response element, SR-ATAD5: Stress-responsive ATAD5, SR-HSE: Stress-responsive heat shock element, SR-MMP: Stress-responsive matrix metalloproteinase, SR-p53: Stress-responsive p53, Vol: Molecular volume, Dense: Molecular density, nHA: Number of hydrogen acceptors, nHD: Number of hydrogen donors, TPSA: Topological polar surface area, nRot: Number of rotatable bonds, nRing: Number of rings, MaxRing: Maximum ring size, nHet: Number of heteroatoms, fChar: Fraction of charged atoms, nRig: Number of rigid bonds, Flex: Flexibility, nStereo: Number of stereocenters, NonGenotoxic\_Carcinogenicity: Non-genotoxic carcinogenicity, LD50\_oral: Oral median lethal dose, Genotoxic\_Carcinogenicity\_Mutagenicity: Genotoxic carcinogenicity and mutagenicity, SureChEMBL: SureChEMBL confidence score, NonBiodegradable: Non-biodegradable compound, Skin\_Sensitization: Skin sensitization potential, Acute\_Aquatic\_Toxicity: Acute aquatic toxicity, Toxicophores: Toxicophores present in the molecule.

**Medicinal Chemistry:** Medicinal chemistry-related parameters, QED: Quantitative Estimate of Drug-likeness, Synth: Synthetic accessibility, Fsp3: Fraction of sp<sup>3</sup>-hybridized carbon atoms, MCE-18: Medicinal chemistry efficiency-18, Natural Product-likeness: Similarity to natural products, Alarm\_NMR: NMR spectrum prediction alarm, BMS: Bristol-Myers Squibb score, Chelating: Chelating potential, PAINS: Pan-Assay Interference Compounds, Lipinski: Lipinski's Rule of Five, Lipinski #violations: Number of Lipinski's Rule of Five violations, Pfizer: Pfizer's Rule of Three, GSK: GlaxoSmithKline's Rule of Three, GoldenTriangle: Golden Triangle rule, Ghose #violations: Number of Ghose's Rule of Five violations, Veber #violations: Number of Veber's Rule of Five violations, Egan #violations: Number of Egan's Rule of Three violations, Muegge #violations: Number of Muegge's Rule of Three violations, Bioavailability Score: Compound bioavailability score, Synthetic Accessibility: Ease of synthesis.
